# Supplementary material for: Nanoparticle attachment on Ag nanorings and nanoantenna for large increases of surface-enhanced Raman scattering
Source: Royal Society of Chemistry journal article supplement (doi:10.1039/c4ra02741h), 2014-01-01
Supplement: c4ra02741h1.pdf [file c4ra02741h1.pdf]

## Electronic supplementary information

### Nanoparticle attachment on Ag nanorings nanoantenna for large increases of Surface-enhanced Raman scattering

Zao Yi<sup>a,b</sup>, Jiangshan Luo<sup>b</sup>, Yong Yi<sup>c</sup>, Xibin Xu<sup>a,b</sup>, Pinghui Wu<sup>d</sup>, Xiaodong Jiang<sup>b</sup>, Yougen Yi<sup>a\*</sup>,

Yongjian Tang<sup>b\*\*</sup>

<sup>a</sup> College of Physics and Electronics, Central South University, Changsha 410083, Hunan, China

<sup>b</sup> Research Center of Laser Fusion, China Academy of Engineering Physics (CAEP), Mianyang 621900, Sichuan, China

<sup>c</sup> Joint Laboratory for Extreme Conditions Matter Properties, Southwest University of Science and Technology and Research Center of Laser Fusion, CAEP, Mianyang 621900, Sichuan, China

<sup>d</sup> State Key Laboratory of Modern Optical Instrumentation, Department of Optical Engineering, Zhejiang University, Hangzhou 310027, Zhejiang, China

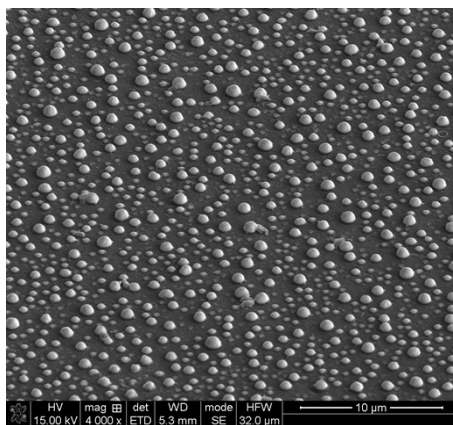

Figure S1: SEM image Ag nanoparticles prepared by the heat treatment of Ag<sup>+</sup>/PVA/PVP composite film after reduction.

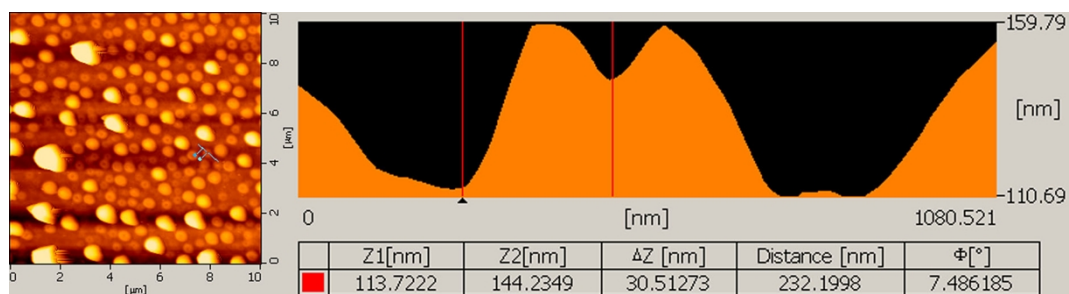

Figure S2: (Left) AFM images of height heat treatment of Ag<sup>+</sup>/PVA composite film without reduction (sample 3). (Right) the section analysis obtained by AFM.

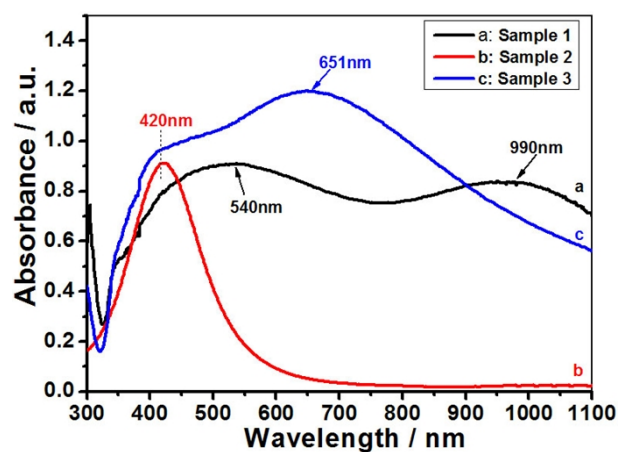

Figure S3: UV-Vis absorption spectra of Ag nanoparticles on quartz glass wafer with different experiment conditions: (a) sample 1, (b) sample 2, (c) sample 3.

**The calculation of EF is followed:**

To determine the enhancement effect of R6G on the nanoparticles quantitatively, the enhancement factor (EF) values of R6G in the nanoparticles is calculated the following expression:

$$EF = \frac{I_{SERS}}{I_{Ref}} \bullet \frac{N_{Ref}}{N_{SERS}}$$

$I_{SERS}$  is the enhanced intensity of the adsorbed R6G molecules on the SERS substrate. The value of  $I_{SERS}$  mainly arises from a single molecule layer covering a nanoparticle array, from which other additional molecule layers of analytes on the SERS substrate, as previously reported [1], do not contribute to Raman gain and can be neglected.  $I_{Ref}$  is the spontaneous Raman scattering intensity from the bulk R6G molecules under the laser spot on the blank glass substrate.  $N_{SERS}$  is the number of the single-layer molecules covering the SERS substrate under the laser spot.  $N_{Ref}$  is the number of the bulk molecules excited by laser on the surface of the regular substrate. In order to obtain the values of these four parameters, we follow the same procedures based on the published literatures [2, 3]. Using the 100× objective lens, we determine the area of the laser spot size at around 1  $\mu\text{m}^2$ . We also calculate the area of a single molecule of R6G to be approximately  $1 \times 10^4 \text{ nm}^2$ . Thus, the value of  $N_{SERS}$  under the laser excitation is approximately  $1 \times 10^2$  molecules. The focusing scope of laser beam is approximately 5  $\mu\text{m}$ , thus scattering from all R6G molecules underneath the laser spot is detected. Assuming a uniform distribution of R6G over the droplet area of 2  $\text{mm}^2$ , the value of  $N_{Ref}$  is approximately  $1.5 \times 10^7$  molecules. Therefore, from the equation, the EF is simply  $(1.5 \times 10^5) \cdot (I_{SERS}/I_{Ref})$ . Then, the EF for the sample 1, sample 7 and sample 8 were roughly estimated by comparing the peak intensity at 1648  $\text{cm}^{-1}$  to  $1.9 \times 10^{10}$ ,  $2.9 \times 10^9$  and  $9.8 \times 10^8$ , respectively.

### Reference

- [1] K.L. Wustholz, A. Henry, J.M. McMahon, R.G. Freeman, N. Valley, M.E. Piotti, M.J. Natan, G.C. Schatz, R.P. Duyne, *J. Am. Chem. Soc.* 132 (2010) 10903.
- [2] Y. Zhao, X.J. Zhang, J. Ye, L.M. Chen, S.P. Lau, W.J. Zhang, S.T. Lee, *ACS Nano* 5 (2011) 3027.

[3] Z. Yi, X. L. Tan, G. Niu, X. B. Xu, X. B. Li, X. Ye, J. S. Luo, B. C. Luo, W. D. Wu, Y. J. Tang, Y.

G. Yi, *Appl. Surf. Sci.* 258 (2012) 5429.
